# Supplementary material
Source: PubMed Central journal article supplement (PMC7646240)
Supplement: CJN.04780420SupplementaryData.pdf [file CJN.04780420SupplementaryData.pdf]

**Supplemental files**

**Numbers of Tables: 3**

**Numbers of Figures: 1**

**Supplemental Table 1. Clinical Classifications of disease severity of COVID-19 patients**

**Supplemental Table 2. Baseline laboratory data and treatment of COVID-19 patients**

**Supplemental Table 3. Association of kidney injury indicators with death and disease progression in patients with coronavirus disease 2019 (COVID-19).**

**Supplemental Figure 1. The prevalence of kidney injury in (A) severe and (B) critical patients.**

**Supplemental-Table 1. Clinical Classifications of disease severity of COVID-19 patients<sup>a</sup>**

| Stage    | Classifications                                                                                                                                                                                                                                                                                                  |
|----------|------------------------------------------------------------------------------------------------------------------------------------------------------------------------------------------------------------------------------------------------------------------------------------------------------------------|
| Mild     | Mild clinical symptoms with no pneumonia manifestation in imaging.                                                                                                                                                                                                                                               |
| Moderate | Fever, respiratory tract symptoms with pneumonia manifestation in imaging.                                                                                                                                                                                                                                       |
| Severe   | Meeting any of the followings:<br>Respiratory distress, RR $\geq$ 30 breaths/min;<br>Pulse oxygen saturation (SpO <sub>2</sub> ) $\leq$ 93% on room air at rest state;<br>Arterial partial pressure of oxygen (PaO <sub>2</sub> ) / oxygen concentration (FiO <sub>2</sub> ) $\leq$ 300 mmHg (1 mmHg=0.133 kPa). |
| Critical | Meeting any of the followings:<br>Respiratory failure occurs and mechanical ventilation is required;<br>Shock occurs;<br>Complicated with other organ failure that requires monitoring and treatment in ICU.                                                                                                     |

<sup>a</sup>These classifications are selected from Guidance for Corona Virus Disease 2019 edited by National Health Committee of the People's Republic of China

**Supplemental-Table 2. Baseline laboratory data and treatment of COVID-19 patients**

|                                                          | Total(n=555)     | Wuhan(n=138)     | Shenzhen(n=417)  |
|----------------------------------------------------------|------------------|------------------|------------------|
| <b>Laboratory findings</b>                               |                  |                  |                  |
| Leukocyte count- $\times 10^9/L$                         | 4.8(3.9, 6.2)    | 5.5(4.4, 7.7)    | 4.7(3.8, 5.8)    |
| Leukocyte count $>10 \times 10^9/L$ -No, %               | 33 (6)           | 23 (17)          | 10 (2)           |
| Leukocyte count $<4 \times 10^9/L$ -No, %                | 151 (27)         | 26 (19)          | 125 (30)         |
| Hemoglobin-g/L                                           | 135(123, 145)    | 124(115, 138)    | 137(126, 146)    |
| Platelet count $\times 10^9/L$                           | 192(150, 244)    | 224(156, 291)    | 187(148, 233)    |
| Platelet count $<150 \times 10^9/L$ -No, %               | 137(25)          | 30(22)           | 107(26)          |
| Lymphocyte count $\times 10^9/L$                         | 1.2 (0.9, 1.7)   | 0.9 (0.6, 1.4)   | 1.31(1.0, 1.8)   |
| Lymphocyte count $<1.5 \times 10^9/L$ -No, %             | 362(65)          | 109(79)          | 253(61)          |
| Alanine aminotransferase -U/L                            | 21(15, 33)       | 22(16, 40)       | 21(15, 31)       |
| Aspartate aminotransferase -U/L                          | 27(20, 36)       | 28(18, 41)       | 27(21, 35)       |
| Liver injury <sup>a</sup> -No, %                         | 120(22)          | 60(43)           | 60(14)           |
| Albumin-g/L                                              | 41.9(38.0, 44.5) | 34.1(30.5, 37.7) | 43.1(41.0, 45.3) |
| Lactic dehydrogenase -U/L <sup>b</sup>                   | 244(186, 412)    | 290(234, 407)    | 223(174, 412)    |
| Lactic dehydrogenase $>250U/L$ -No/total, %              | 262 (49)         | 92 (67)          | 170(43)          |
| Nitrogen-mg/dl <sup>b</sup>                              | 72(58, 90)       | 83(60, 119)      | 70(58, 86)       |
| Creatinine mg/dl <sup>b</sup>                            | 0.7(0.6, 0.9)    | 0.8(0.7, 1.0)    | 0.7(0.6, 0.9)    |
| Creatinine $>1.5mg/dl$ -No, %                            | 13(2)            | 11(8)            | 2(0.5)           |
| C reactive protein-mg/L <sup>b</sup>                     | 11.0(3.3, 35.2)  | 36.5(6.3, 85.5)  | 8.7(2.8, 24.7)   |
| C reactive protein $>10mg/L$ -No/total, %                | 289(52)          | 93(67)           | 196(47)          |
| D-Dimer $>0.5mg/L$ -No/total, % <sup>b</sup>             | 224(41)          | 105(76)          | 119(29)          |
| Cardiac troponin I $>0.04ng/L$ -No/total, % <sup>b</sup> | 22(5)            | 14(10)           | 8(3)             |
| Procalcitonin $>0.5ng/ml$ -No/total, % <sup>b</sup>      | 13(2)            | 13(10)           | 0(0)             |
| <b>Treatment-No, %</b>                                   |                  |                  |                  |
| Anti-virus agents                                        | 550(99)          | 134(97)          | 416(100)         |
| Before Hospitalization                                   | 154(28)          | 98(71)           | 56(13)           |
| Antibiotics                                              | 278(50)          | 117(85)          | 161(38)          |
| Before Hospitalization                                   | 169(31)          | 94(68)           | 75(18)           |
| NSAIDs                                                   | 174(31)          | 31(22)           | 143(34)          |
| Before Hospitalization                                   | 64(12)           | 16(12)           | 48(12)           |
| Herbal Medicine                                          | 430(78)          | 123(89)          | 307(74)          |
| Before Hospitalization                                   | 82(15)           | 64(46)           | 18(4)            |
| Corticosteroids                                          | 150(27)          | 43(31)           | 107(26)          |
| Before Hospitalization                                   | 18(3)            | 16(12)           | 2(0.5)           |
| Mechanical ventilation-No, %                             | 70(13)           | 33(24)           | 37(9)            |

Abbreviations: NSAIDs, Nonsteroidal anti-inflammatory drugs.

<sup>a</sup>Liver injury defined as alanine aminotransferase or aspartate aminotransferase  $> 40U/L$ .

<sup>b</sup>Missing data, Lactic dehydrogenase-18, Nitrogen-5, Creatinine-5, C reactive protein-1, D-Dimer-6, Cardiac troponin I-114, Procalcitonin-10.

**Supplemental-Table 3. Association of kidney injury indicators with in-hospital death and disease progression in patients with coronavirus disease 2019 (COVID-19).**

| Outcomes                                                  | Exposed (number of events/number of patients) | Unexposed (number of events/number of patients) | RR (95%CI)           | <i>p</i> value |
|-----------------------------------------------------------|-----------------------------------------------|-------------------------------------------------|----------------------|----------------|
| <b>In-hospital death(n=555)<sup>a</sup></b>               |                                               |                                                 |                      |                |
| Proteinuria                                               | 20/174                                        | 3/346                                           | 4.57 (1.27 to 16.38) | 0.02           |
| Hematuria                                                 | 18/112                                        | 5/408                                           | 3.98 (1.64 to 9.66)  | 0.002          |
| In-hospital AKI                                           | 9/21                                          | 16/499                                          | 3.33 (1.57 to 7.05)  | 0.002          |
| Prehospital AKI                                           | 3/8                                           | 22/512                                          | 1.21 (0.45 to 3.22)  | 0.70           |
| Any kidney injury                                         | 23/229                                        | 2/320                                           | 4.92 (1.17 to 20.61) | 0.03           |
| <b>Progression to critical illness(n=520)<sup>b</sup></b> |                                               |                                                 |                      |                |
| Proteinuria                                               | 24/150                                        | 12/337                                          | 2.21 (1.03 to 4.74)  | 0.04           |
| Hematuria                                                 | 18/94                                         | 18/393                                          | 1.82 (1.03 to 3.23)  | 0.04           |
| In-hospital AKI                                           | 5/11                                          | 35/476                                          | 1.49 (0.65 to 3.39)  | 0.35           |
| Prehospital AKI                                           | 2/5                                           | 38/482                                          | 1.16 (0.39 to 3.45)  | 0.79           |
| Any kidney injury                                         | 29/202                                        | 11/314                                          | 2.04 (1.01 to 4.10)  | 0.05           |

Rate ratios (RRs) of each variable were obtained using separate Poisson regression models after adjustment for age, sex, disease severity at admission, lactate dehydrogenase, C-reactive protein, troponin, d-dimer, lymphocyte count and comorbidities. Comorbidities include chronic kidney disease, hypertension, diabetes, coronary heart disease, chronic pulmonary disease or malignant tumor history.

<sup>a</sup>For the outcome of in-hospital death, 35 individuals for proteinuria, 35 for hematuria, 35 for in-hospital AKI, 35 for prehospital AKI and 6 for any kidney injury were excluded due to missing data.

<sup>b</sup>For the outcome of progression to critical illness, 33 individuals for proteinuria, 33 for hematuria, 33 for in-hospital AKI, 33 for prehospital AKI and 4 for any kidney injury were excluded due to missing data.

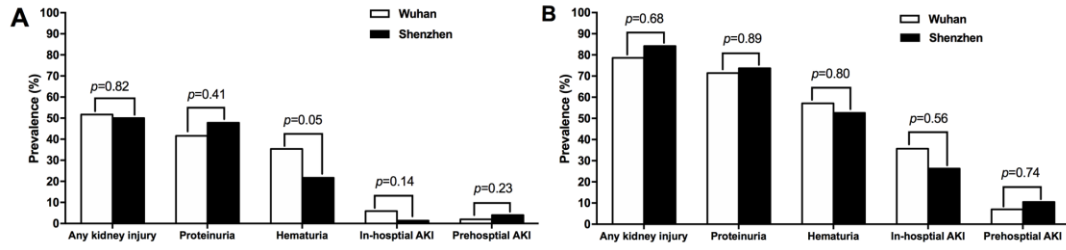

|   |          | Any kidney injury | Proteinuria  | Hematuria    | In-hospital AKI | Prehospital AKI |
|---|----------|-------------------|--------------|--------------|-----------------|-----------------|
| A | Wuhan    | 52% (62/120)      | 42% (47/113) | 35% (40/113) | 6% (7/119)      | 2% (2/119)      |
|   | Shenzhen | 50% (36/72)       | 48% (33/69)  | 22% (15/69)  | 1% (1/71)       | 4% (3/71)       |
| B | Wuhan    | 79% (11/14)       | 71% (10/14)  | 57% (8/14)   | 36% (5/14)      | 7% (1/14)       |
|   | Shenzhen | 84% (16/19)       | 74% (14/19)  | 53% (10/19)  | 26% (5/19)      | 11% (2/19)      |

**Supplemental Figure 1. The prevalence of kidney injury in severe (A) and critical (B) patients.**

Severe and critical referred to disease severity at admission. 14 individuals for proteinuria, 14 for hematuria, 6 for in-hospital AKI, 6 for pre-hospital AKI and 4 for any kidney injury were excluded due to missing data.
